# Supplementary material
Source: ML conference proceedings conference paper supplement (https://proceedings.mlr.press/v108/sun20a.html)
Supplement: Supplementary file [file sun20a-supp.pdf]

# Supplementary materials for “Finite-Sample Analysis of Decentralized Temporal-Difference Learning with Linear Function Approximation”

## A Proof of Theorem 1

*Proof.* From the definition of  $\mathbf{G}(\Theta)$  in (24), we have that

$$\begin{aligned} \mathbf{G}(\Theta(k), \xi_k) &= \begin{bmatrix} \theta_1^\top(k) [\gamma \phi(s(k+1)) - \phi(s(k))] \phi^\top(s(k)) \\ \theta_2^\top(k) [\gamma \phi(s(k+1)) - \phi(s(k))] \phi^\top(s(k)) \\ \vdots \\ \theta_M^\top(k) [\gamma \phi(s(k+1)) - \phi(s(k))] \phi^\top(s(k)) \end{bmatrix} + \begin{bmatrix} r_1(k) \phi^\top(s(k)) \\ r_2(k) \phi^\top(s(k)) \\ \vdots \\ r_M(k) \phi^\top(s(k)) \end{bmatrix} \\ &= \Theta(k) [\gamma \phi(s(k+1)) - \phi(s(k))] \phi^\top(s(k)) + \mathbf{r}(k) \phi^\top(s(k)) \\ &= \Theta(k) \mathbf{H}^\top(\xi_k) + \mathbf{r}(k) \phi^\top(s(k)) \end{aligned}$$

where we have used the definitions that  $\mathbf{r}(k) = [r_1(k) \ r_2(k) \ \cdots \ r_M(k)]^\top$  and  $\mathbf{H}(\xi_k) := \phi(s(k)) [\gamma \phi^\top(s(k+1)) - \phi^\top(s(k))]$ . Using standard norm inequalities, it follows that

$$\begin{aligned} \|\Delta \mathbf{G}(\Theta(k), \xi_k)\|_F &\leq \|[\gamma \phi(s(k+1)) - \phi(s(k))] \phi^\top(s(k))\|_F \cdot \|\Delta \Theta(k)\|_F + \|\mathbf{r}(k) \phi^\top(s(k))\|_F \\ &\leq [\|\gamma \phi(s(k+1))\|_F + \|\phi(s(k))\|_F] \cdot \|\phi^\top(s(k))\|_F \cdot \|\Delta \Theta(k)\|_F + \|\mathbf{r}(k)\|_F \cdot \|\phi(s(k))\|_F \\ &\leq (1 + \gamma) \|\Delta \Theta(k)\|_F + \sqrt{M} r_{\max} \\ &\leq 2 \|\Delta \Theta(k)\|_F + \sqrt{M} r_{\max} \end{aligned} \tag{44}$$

where  $1 + \gamma \leq 2$  for the discounting factor  $0 \leq \gamma < 1$ , and the last inequality holds since feature vectors  $\|\phi(s)\| \leq 1$ , rewards  $r(k) \leq r_{\max}$ , and the Frobenious norm of rank-one matrices is equivalent to the  $\ell_2$ -norm of vectors. For future reference, notice from the above inequality that  $\lambda_{\max}(\mathbf{H}(\xi_k)) \leq \|\mathbf{H}(\xi_k)\|_F = \|[\gamma \phi(s(k+1)) - \phi(s(k))] \phi^\top(s(k))\| \leq 1 + \gamma \leq 2$ , for all  $k \in \mathbb{N}^+$ .

It follows from (28) that

$$\begin{aligned} \|\Delta \Theta(k+1)\|_F &\leq \|\mathbf{W} \Delta \Theta(k)\|_F + \alpha \|\Delta \mathbf{G}(\Theta(k))\|_F \\ &\leq [\lambda_2^{\mathbf{W}} + 2\alpha] \|\Delta \Theta(k)\|_F + \alpha \sqrt{M} r_{\max} \end{aligned} \tag{45}$$

where the second inequality is obtained after using (44), and the following inequality [Nedić et al., 2018, Ma et al., 2019]

$$\|\mathbf{W} \Delta \Theta(k)\|_F = \left\| \mathbf{W} \left( \mathbf{I} - \frac{1}{M} \mathbf{1} \mathbf{1}^\top \right) \Theta(k) \right\| \leq \lambda_2^{\mathbf{W}} \|\Delta \Theta(k)\|_F. \tag{46}$$

Then applying (45) recursively from iteration  $k$  to 0 gives rise to

$$\begin{aligned} \|\Delta \Theta(k)\|_F &\leq (\lambda_2^{\mathbf{W}} + 2\alpha)^k \|\Delta \Theta(0)\|_F + \alpha \sqrt{M} r_{\max} \sum_{i=0}^{k-1} (\lambda_2^{\mathbf{W}} + 2\alpha)^i \\ &\leq (\lambda_2^{\mathbf{W}} + 2\alpha)^k \|\Delta \Theta(0)\|_F + \frac{\alpha \sqrt{M} r_{\max}}{1 - \lambda_2^{\mathbf{W}} - 2\alpha} \\ &\leq (\lambda_2^{\mathbf{W}} + 2\alpha)^k \|\Delta \Theta(0)\|_F + \alpha \cdot \frac{2\sqrt{M} r_{\max}}{1 - \lambda_2^{\mathbf{W}}} \end{aligned} \tag{47}$$

where the last inequality is a consequence of using the fact that  $0 < \alpha < \frac{1}{2} \cdot \frac{1 - \lambda_2^{\mathbf{W}}}{2}$ . This concludes the proof of Theorem 1.  $\square$

## B Proof of Lemma 1

*Proof.* Recalling the definitions of  $\mathbf{H}(\xi_k)$  ( $\bar{\mathbf{H}}$ ) and  $\mathbf{b}(\xi_k)$  ( $\bar{\mathbf{b}}$ ), it is not difficult to verify that in the stationary distribution  $\pi$  of the Markov chain, the expectations of  $\mathbf{H}(\xi_k)$  and  $\mathbf{b}(\xi_k)$  obey

$$\mathbb{E}_\pi[\mathbf{H}(\xi_k)] = \bar{\mathbf{H}} \quad (48)$$

and

$$\mathbb{E}_\pi[\mathbf{b}_G(\xi_k)] = \bar{\mathbf{b}}_G. \quad (49)$$

Thus,

$$\mathbb{E}_\pi \left[ \frac{1}{M} \mathbf{G}^\top(\Theta(k), \xi_k) \mathbf{1} \middle| \mathcal{F}(k) \right] = \mathbb{E}_\pi [\mathbf{H}(\xi_k) \bar{\boldsymbol{\theta}}(k) + \mathbf{b}_G(\xi_k) \middle| \mathcal{F}(k)] = \bar{\mathbf{H}} \bar{\boldsymbol{\theta}}(k) + \bar{\mathbf{b}}_G \quad (50)$$

and its variance satisfies

$$\begin{aligned} \mathbb{E}_\pi \left[ \left\| \frac{1}{M} \mathbf{G}^\top(\Theta(k), \xi_k) \mathbf{1} - \bar{\mathbf{g}}(\bar{\boldsymbol{\theta}}(k)) \right\|^2 \middle| \mathcal{F}(k) \right] &= \mathbb{E}_\pi \left[ \left\| (\mathbf{H}(\xi_k) - \bar{\mathbf{H}}) \bar{\boldsymbol{\theta}}(k) + \mathbf{b}_G(\xi_k) - \bar{\mathbf{b}}_G \right\|^2 \middle| \mathcal{F}(k) \right] \\ &\leq \mathbb{E}_\pi [2 \left\| (\mathbf{H}(\xi_k) - \bar{\mathbf{H}}) \bar{\boldsymbol{\theta}}(k) \right\|^2 + 2 \left\| \mathbf{b}_G(\xi_k) - \bar{\mathbf{b}}_G \right\|^2 \middle| \mathcal{F}(k)] \\ &\leq 2\beta^2 \left\| \bar{\boldsymbol{\theta}}(k) - \boldsymbol{\theta}^* + \boldsymbol{\theta}^* \right\|^2 + 8r_{\max}^2 \\ &\leq 4\beta^2 \left\| \bar{\boldsymbol{\theta}}(k) - \boldsymbol{\theta}^* \right\|^2 + 4\beta^2 \left\| \boldsymbol{\theta}^* \right\|^2 + 8r_{\max}^2 \end{aligned} \quad (51)$$

where  $\beta$  denotes the largest absolute value of eigenvalues of  $\mathbf{H}(\xi_k) - \bar{\mathbf{H}}$ , for any  $k \in \mathbb{N}^+$ .  $\square$

## C Proof of Theorem 2

*Proof.* Clearly, it holds that

$$\begin{aligned} \mathbb{E}_\pi [\left\| \bar{\boldsymbol{\theta}}(k+1) - \boldsymbol{\theta}^* \right\|^2 \middle| \mathcal{F}(k)] &= \mathbb{E}_\pi \left[ \left\| \bar{\boldsymbol{\theta}}(k) - \boldsymbol{\theta}^* + \alpha \frac{1}{M} \mathbf{G}^\top(\Theta, \xi_k) \mathbf{1} \right\|^2 \middle| \mathcal{F}(k) \right] \\ &\leq \left\| \bar{\boldsymbol{\theta}}(k) - \boldsymbol{\theta}^* \right\|^2 + 2\alpha \left\langle \bar{\boldsymbol{\theta}}(k) - \boldsymbol{\theta}^*, \mathbb{E}_\pi \left[ \frac{1}{M} \mathbf{G}(\Theta(k), \xi_k)^T \mathbf{1} \middle| \mathcal{F}(k) \right] \right\rangle \\ &\quad + \alpha^2 \mathbb{E}_\pi \left[ \left\| \frac{1}{M} \mathbf{G}(\Theta(k), \xi_k)^T \mathbf{1} - \bar{\mathbf{g}}(\bar{\boldsymbol{\theta}}(k)) + \bar{\mathbf{g}}(\bar{\boldsymbol{\theta}}(k)) \right\|^2 \middle| \mathcal{F}(k) \right] \\ &\leq \left\| \bar{\boldsymbol{\theta}}(k) - \boldsymbol{\theta}^* \right\|^2 + 2\alpha \left\langle \bar{\boldsymbol{\theta}}(k) - \boldsymbol{\theta}^*, \bar{\mathbf{g}}(\bar{\boldsymbol{\theta}}(k)) - \bar{\mathbf{g}}(\bar{\boldsymbol{\theta}}^*) \right\rangle \\ &\quad + 2\alpha^2 (\beta^2 \left\| \bar{\boldsymbol{\theta}} \right\|^2 + r_{\max}^2) + 2\alpha^2 \left\| \bar{\mathbf{g}}(\bar{\boldsymbol{\theta}}(k)) - \bar{\mathbf{g}}(\bar{\boldsymbol{\theta}}^*) \right\|^2 \\ &\leq \left\| \bar{\boldsymbol{\theta}}(k) - \boldsymbol{\theta}^* \right\|^2 + 2\alpha \left\langle \bar{\boldsymbol{\theta}}(k) - \boldsymbol{\theta}^*, \bar{\mathbf{H}}(\bar{\boldsymbol{\theta}}(k) - \boldsymbol{\theta}^*) \right\rangle \\ &\quad + 2\alpha^2 (4\beta^2 \left\| \bar{\boldsymbol{\theta}} - \boldsymbol{\theta}^* \right\|^2 + 4\beta^2 \left\| \boldsymbol{\theta}^* \right\|^2 + 8r_{\max}^2) + 2\alpha^2 \left\| \bar{\mathbf{H}}(\bar{\boldsymbol{\theta}}(k) - \boldsymbol{\theta}^*) \right\|^2 \\ &\leq \left[ 1 + 2\alpha \lambda_{\max}^{\bar{\mathbf{H}}} + 8\alpha^2 \beta^2 + 2\alpha^2 (\lambda_{\min}^{\bar{\mathbf{H}}})^2 \right] \left\| \bar{\boldsymbol{\theta}}(k) - \boldsymbol{\theta}^* \right\|^2 \\ &\quad + (8\alpha^2 \beta^2 \left\| \boldsymbol{\theta}^* \right\|^2 + 16\alpha^2 r_{\max}^2). \end{aligned} \quad (52)$$

where  $\lambda_{\max}^{\bar{\mathbf{H}}}$  and  $\lambda_{\min}^{\bar{\mathbf{H}}}$  are the largest and the smallest eigenvalues of  $\bar{\mathbf{H}}$ , respectively. Because  $\bar{\mathbf{H}}$  is a negative definite matrix, then it follows that  $\lambda_{\min}^{\bar{\mathbf{H}}} < \lambda_{\max}^{\bar{\mathbf{H}}} < 0$ .

Defining constants  $c_1 := 1 + 2\alpha \lambda_{\max}^{\bar{\mathbf{H}}} + 8\alpha^2 \beta^2 + 2\alpha^2 (\lambda_{\min}^{\bar{\mathbf{H}}})^2$ , and choosing any constant stepsize  $\alpha$  obeying  $0 < \alpha \leq -\frac{1}{2} \cdot \frac{\lambda_{\max}^{\bar{\mathbf{H}}}}{4\beta^2 + (\lambda_{\min}^{\bar{\mathbf{H}}})^2}$ , then we have  $c_1 < 1$  and  $\frac{1}{1-c_1} \leq -\frac{1}{\alpha \lambda_{\max}^{\bar{\mathbf{H}}}}$ . Now, taking expectation with respect to  $\mathcal{F}(k)$  in (52) gives rise to

$$\mathbb{E} [\left\| \bar{\boldsymbol{\theta}}(k+1) - \boldsymbol{\theta}^* \right\|^2] \leq c_1 \mathbb{E} [\left\| \bar{\boldsymbol{\theta}}(k) - \boldsymbol{\theta}^* \right\|^2] + (8\alpha^2 \beta^2 \left\| \boldsymbol{\theta}^* \right\|^2 + 16\alpha^2 r_{\max}^2). \quad (53)$$

Applying the above recursion from iteration  $k$  to iteration 0 yields

$$\mathbb{E} [\left\| \bar{\boldsymbol{\theta}}(k) - \boldsymbol{\theta}^* \right\|^2] \leq c_1^k \left\| \bar{\boldsymbol{\theta}}(0) - \boldsymbol{\theta}^* \right\|^2 + \frac{1-c_1^k}{1-c_1} (8\alpha^2 \beta^2 \left\| \boldsymbol{\theta}^* \right\|^2 + 16\alpha^2 r_{\max}^2)$$

$$\begin{aligned}
 &\leq c_1^k \|\bar{\boldsymbol{\theta}}(0) - \boldsymbol{\theta}^*\|^2 + \frac{8\alpha^2\beta^2\|\boldsymbol{\theta}^*\|^2 + 16\alpha^2r_{\max}^2}{-\alpha\lambda_{\max}^{\bar{\mathbf{H}}}} \\
 &\leq c_1^k \|\bar{\boldsymbol{\theta}}(0) - \boldsymbol{\theta}^*\|^2 + \alpha c_2
 \end{aligned} \tag{54}$$

where  $c_2 := \frac{8\beta^2\|\boldsymbol{\theta}^*\|^2 + 16r_{\max}^2}{-\lambda_{\max}^{\bar{\mathbf{H}}}}$ , and this concludes the proof.  $\square$

## D Proof of Proposition 1

*Proof.* We have that

$$\begin{aligned}
 \mathbb{E}[\|\boldsymbol{\theta}_m(k) - \boldsymbol{\theta}^*\|^2] &= \mathbb{E}[\|\boldsymbol{\theta}_m(k) - \bar{\boldsymbol{\theta}}(k) + \bar{\boldsymbol{\theta}}(k) - \boldsymbol{\theta}^*\|^2] \\
 &\leq 2\mathbb{E}[\|\boldsymbol{\theta}_m(k) - \bar{\boldsymbol{\theta}}(k)\|^2] + 2\mathbb{E}[\|\bar{\boldsymbol{\theta}}(k) - \boldsymbol{\theta}^*\|^2] \\
 &\leq 2\mathbb{E}[\|\boldsymbol{\Delta}\boldsymbol{\Theta}(k)\|_F^2] + 2\mathbb{E}[\|\bar{\boldsymbol{\theta}}(k) - \boldsymbol{\theta}^*\|^2] \\
 &\leq 2\mathbb{E}\left[(\lambda_2^{\mathbf{W}} + 2\alpha)^k \|\boldsymbol{\Delta}\boldsymbol{\Theta}(0)\|_F + \frac{2\alpha\sqrt{M}r_{\max}}{1 - \lambda_2^{\mathbf{W}}}\right]^2 + 2c_1^k \|\bar{\boldsymbol{\theta}}(0) - \boldsymbol{\theta}^*\|^2 + 2\alpha c_2 \\
 &\leq 4(\lambda_2^{\mathbf{W}} + 2\alpha)^{2k} \|\boldsymbol{\Delta}\boldsymbol{\Theta}(0)\|_F^2 + \frac{8\alpha^2Mr_{\max}^2}{(1 - \lambda_2^{\mathbf{W}})^2} + 2c_1^k \|\bar{\boldsymbol{\theta}}(0) - \boldsymbol{\theta}^*\|^2 + 2\alpha c_2.
 \end{aligned} \tag{55}$$

where the third inequality follows from using (29) and (54). Letting  $c_3 := \max\{(\lambda_2^{\mathbf{W}} + 2\alpha)^2, c_1\}$ ,  $V_0 := 2\max\{4\|\boldsymbol{\Delta}\boldsymbol{\Theta}(0)\|_F^2, 2\|\bar{\boldsymbol{\theta}}(0) - \boldsymbol{\theta}^*\|^2\}$ , and  $c_4 := \alpha \cdot \frac{8Mr_{\max}^2}{(1 - \lambda_2^{\mathbf{W}})^2} + \frac{16\beta^2\|\boldsymbol{\theta}^*\|^2 + 32r_{\max}^2}{-\lambda_{\max}^{\bar{\mathbf{H}}}}$ , then it is straightforward from (55) that our desired result follows; that is,

$$\mathbb{E}[\|\boldsymbol{\theta}_m(k) - \boldsymbol{\theta}^*\|^2] \leq c_3^k V_0 + c_4 \alpha \tag{56}$$

which concludes the proof.  $\square$

## E Proof of Lemma 2

*Proof.* For notational brevity, let  $r_{\mathcal{G}}(k) := (1/M) \sum_{m \in \mathcal{M}} r_m(k)$  for each  $k \in \mathbb{N}^+$ . It then follows that

$$\begin{aligned}
 &\left\| \frac{1}{KM} \sum_{j=k}^{k+K-1} \mathbb{E}[\mathbf{G}^\top(\boldsymbol{\Theta}, \xi_j) \mathbf{1} | \mathcal{F}(k)] - \bar{\mathbf{g}}(\bar{\boldsymbol{\theta}}) \right\| \\
 &= \left\| \frac{1}{K} \sum_{j=k}^{k+K-1} \mathbb{E}[\boldsymbol{\phi}(s(k)) [\gamma \boldsymbol{\phi}(s(k+1)) - \boldsymbol{\phi}(s(k))]^\top \bar{\boldsymbol{\theta}} + \frac{1}{M} \boldsymbol{\phi}(s(k)) \mathbf{r}^\top(k) \mathbf{1}] - \mathbb{E}_\pi[\mathbf{g}(\bar{\boldsymbol{\theta}})] \right\| \\
 &= \left\| \frac{1}{K} \sum_{j=k}^{k+K-1} \sum_{s \in \mathcal{S}} (\Pr[s(j) = s | \mathcal{F}(k)] - \pi(s)) [\boldsymbol{\phi}(s) (\gamma P(s, s') \boldsymbol{\phi}(s') - \boldsymbol{\phi}(s))^\top (\bar{\boldsymbol{\theta}} + \boldsymbol{\theta}^*) + r_{\mathcal{G}}(s) \boldsymbol{\phi}(s)] \right\| \\
 &\leq \max_{s, s'} \left\| \boldsymbol{\phi}(s) [\gamma P(s, s') \boldsymbol{\phi}(s') - \boldsymbol{\phi}(s)]^\top (\bar{\boldsymbol{\theta}} + \boldsymbol{\theta}^*) + r_{\mathcal{G}}(s) \boldsymbol{\phi}(s) \right\| \\
 &\quad \times \frac{1}{K} \sum_{j=k}^{k+K-1} \sum_{s \in \mathcal{S}} |\Pr[s(j) = s | \mathcal{F}(k)] - \pi(s)| \\
 &\leq (1 + \gamma) (\|\bar{\boldsymbol{\theta}} - \boldsymbol{\theta}^*\| + 2\|\boldsymbol{\theta}^*\| + r_{\max}) \times \frac{1}{K} \sum_{j=k}^{k+K-1} \nu_0 \rho^k \cdot \rho^{j-k} \\
 &\leq \frac{(1 + \gamma) \nu_0 \rho^k}{(1 - \rho)K} (\|\bar{\boldsymbol{\theta}} - \boldsymbol{\theta}^*\| + 2\|\boldsymbol{\theta}^*\| + r_{\max}) \\
 &\leq \sigma_k(K) (\|\bar{\boldsymbol{\theta}} - \boldsymbol{\theta}^*\| + 1)
 \end{aligned} \tag{57}$$

where  $\sigma_k(K) = \frac{(1+\gamma)\nu_0\rho^k}{(1-\rho)K} \times \max\{2\|\boldsymbol{\theta}^*\| + r_{\max}, 1\}$ , and the second inequality arises from the fact that any finite-state, irreducible, and aperiodic Markov chains converges geometrically fast (with some initial constant  $\nu_0 > 0$  and rate  $0 < \rho < 1$ ) to its unique stationary distribution [Levin and Peres, 2017, Thm. 4.9]. Thus, we conclude that Lemma 2 holds true with monotonically decreasing function  $\sigma(K)$  of  $K \in \mathbb{N}^+$  as defined above.  $\square$

## F Proof of Lemma 3

*Proof.* Recalling the definition of our multi-step Lyapunov function, we obtain that

$$\mathbb{E}[\mathbb{V}(k+1) - \mathbb{V}(k) | \mathcal{F}(k)] = \mathbb{E}[\|\bar{\boldsymbol{\theta}}(k+K) - \boldsymbol{\theta}^*\|^2 - \|\bar{\boldsymbol{\theta}}(k) - \boldsymbol{\theta}^*\|^2 | \mathcal{F}(k)]. \quad (58)$$

Thus, we should next derive the bound of the right hand side of above equation. Following from iterate (27), we can write

$$\bar{\boldsymbol{\theta}}(k+K) = \bar{\boldsymbol{\theta}}(k) + \frac{\alpha}{M} \sum_{j=k}^{k+K-1} \mathbf{G}^\top(\boldsymbol{\Theta}(j), \xi_j) \mathbf{1}. \quad (59)$$

As a consequence (without particular statement, the expectation in the rest of this proof is taken with respect to the  $\xi_k$  to  $\xi_{k+K-1}$  conditioned on  $\xi_0$  to  $\xi_{k-1}$ ),

$$\begin{aligned} \mathbb{E}[\|\bar{\boldsymbol{\theta}}(k+K) - \boldsymbol{\theta}^*\|^2 | \mathcal{F}(k)] &= \mathbb{E}\left[\left\|\bar{\boldsymbol{\theta}}(k) - \boldsymbol{\theta}^* + \frac{\alpha}{M} \sum_{j=k}^{k+K-1} \mathbf{G}^\top(\boldsymbol{\Theta}(j), \xi_j) \mathbf{1}\right\|^2 | \mathcal{F}(k)\right] \\ &= \mathbb{E}\left[\left\|\bar{\boldsymbol{\theta}}(k) - \boldsymbol{\theta}^* + \frac{\alpha}{M} \sum_{j=k}^{k+K-1} \left[\mathbf{G}^\top(\boldsymbol{\Theta}(j), \xi_j) \mathbf{1} - \mathbf{G}^\top(\boldsymbol{\Theta}(k), \xi_j) \mathbf{1} + \mathbf{G}^\top(\boldsymbol{\Theta}(k), \xi_j) \mathbf{1}\right]\right\|^2 | \mathcal{F}(k)\right] \\ &= \|\bar{\boldsymbol{\theta}}(k) - \boldsymbol{\theta}^*\|^2 \\ &\quad + 2\alpha \mathbb{E}\left[\left\langle \bar{\boldsymbol{\theta}}(k) - \boldsymbol{\theta}^*, K\bar{\mathbf{g}}(\bar{\boldsymbol{\theta}}(k)) + \frac{1}{M} \sum_{j=k}^{k+K-1} \left[\mathbf{G}^\top(\boldsymbol{\Theta}(j), \xi_j) \mathbf{1} - \mathbf{G}^\top(\boldsymbol{\Theta}(k), \xi_j) \mathbf{1} + \mathbf{G}^\top(\boldsymbol{\Theta}(k), \xi_j) \mathbf{1}\right] - K\bar{\mathbf{g}}(\bar{\boldsymbol{\theta}}(k)) \right\rangle | \mathcal{F}(k)\right] \\ &\quad + \alpha^2 \mathbb{E}\left[\left\|\frac{1}{M} \sum_{j=k}^{k+K-1} \left[\mathbf{G}^\top(\boldsymbol{\Theta}(j), \xi_j) \mathbf{1} - \mathbf{G}^\top(\boldsymbol{\Theta}(k), \xi_j) \mathbf{1} + \mathbf{G}^\top(\boldsymbol{\Theta}(k), \xi_j) \mathbf{1}\right]\right\|^2 | \mathcal{F}(k)\right] \\ &= \|\bar{\boldsymbol{\theta}}(k) - \boldsymbol{\theta}^*\|^2 + \underbrace{2\alpha \mathbb{E}\left[\left\langle \bar{\boldsymbol{\theta}}(k) - \boldsymbol{\theta}^*, K\bar{\mathbf{g}}(\bar{\boldsymbol{\theta}}(k)) - K\bar{\mathbf{g}}(\boldsymbol{\theta}^*) \right\rangle | \mathcal{F}(k)\right]}_{\text{the second term}} \\ &\quad + \underbrace{2\alpha \mathbb{E}\left[\left\langle \bar{\boldsymbol{\theta}}(k) - \boldsymbol{\theta}^*, \sum_{j=k}^{k+K-1} \frac{1}{M} \left[\mathbf{G}^\top(\boldsymbol{\Theta}(j), \xi_j) \mathbf{1} - \mathbf{G}^\top(\boldsymbol{\Theta}(k), \xi_j) \mathbf{1}\right]\right\rangle | \mathcal{F}(k)\right]}_{\text{the third term}} \\ &\quad + \underbrace{2\alpha \mathbb{E}\left[\left\langle \bar{\boldsymbol{\theta}}(k) - \boldsymbol{\theta}^*, \sum_{j=k}^{k+K-1} \frac{1}{M} \mathbf{G}^\top(\boldsymbol{\Theta}(k), \xi_j) \mathbf{1} - K\bar{\mathbf{g}}(\bar{\boldsymbol{\theta}}) \right\rangle | \mathcal{F}(k)\right]}_{\text{the fourth term}} \\ &\quad + \underbrace{\alpha^2 \mathbb{E}\left[\left\|\frac{1}{M} \sum_{j=k}^{k+K-1} \left[\mathbf{G}^\top(\boldsymbol{\Theta}(j), \xi_j) \mathbf{1} - \mathbf{G}^\top(\boldsymbol{\Theta}(k), \xi_j) \mathbf{1} + \mathbf{G}^\top(\boldsymbol{\Theta}(k), \xi_j) \mathbf{1}\right]\right\|^2 | \mathcal{F}(k)\right]}_{\text{the last term}} \end{aligned} \quad (60)$$

where the second and the third equality result from adding and subtracting the same terms and the last equality holds since  $\bar{\mathbf{g}}(\boldsymbol{\theta}^*) = 0$ . In the following, we will bound the four terms in the above equality.

- 1) **Bounding the second term.** As a direct result of the definition of  $\bar{\mathbf{g}}(\boldsymbol{\theta})$ , we have that  $\bar{\mathbf{g}}(\bar{\boldsymbol{\theta}}) - \bar{\mathbf{g}}(\boldsymbol{\theta}^*) = \bar{\mathbf{H}}(\bar{\boldsymbol{\theta}} - \boldsymbol{\theta}^*)$ . Therefore, it holds that

$$2\alpha \mathbb{E}\left[\left\langle \bar{\boldsymbol{\theta}}(k) - \boldsymbol{\theta}^*, K\bar{\mathbf{g}}(\bar{\boldsymbol{\theta}}(k)) - K\bar{\mathbf{g}}(\boldsymbol{\theta}^*) \right\rangle | \mathcal{F}(k)\right] = 2\alpha K \mathbb{E}\left[(\bar{\boldsymbol{\theta}}(k) - \boldsymbol{\theta}^*)^\top \bar{\mathbf{H}}(\bar{\boldsymbol{\theta}}(k) - \boldsymbol{\theta}^*) | \mathcal{F}(k)\right]$$

$$\leq 2\alpha K \lambda_{\max}^{\bar{\mathbf{H}}} \|\bar{\boldsymbol{\theta}}(k) - \boldsymbol{\theta}^*\|^2 \quad (61)$$

where  $\lambda_{\max}^{\bar{\mathbf{H}}}$  is the largest eigenvalue of  $\bar{\mathbf{H}}$ . Because  $\bar{\mathbf{H}}$  is a negative definite matrix, it holds that  $\lambda_{\max}^{\bar{\mathbf{H}}} < 0$ .

2) **Bounding the third term.** Defining first  $\mathbf{p}(k, \boldsymbol{\Theta}(k), K) := \sum_{j=k}^{k+K-1} \frac{1}{M} [\mathbf{G}^\top(\boldsymbol{\Theta}(j), \xi_j) \mathbf{1} - \mathbf{G}^\top(\boldsymbol{\Theta}(k), \xi_j) \mathbf{1}]$ , then it follows that

$$\begin{aligned} \mathbf{p}(k, \boldsymbol{\Theta}(k), K) &= \sum_{j=k}^{k+K-2} \frac{1}{M} [\mathbf{G}^\top(\boldsymbol{\Theta}(j), \xi_j) \mathbf{1} - \mathbf{G}^\top(\boldsymbol{\Theta}(k), \xi_j) \mathbf{1}] \\ &\quad + \frac{1}{M} [\mathbf{G}^\top(\boldsymbol{\Theta}(k+K-1), \xi_{k+K-1}) \mathbf{1} - \mathbf{G}^\top(\boldsymbol{\Theta}(k), \xi_{k+K-1}) \mathbf{1}] \\ &= \mathbf{p}(k, \boldsymbol{\Theta}(k), K-1) + \frac{1}{M} [\mathbf{G}^\top(\boldsymbol{\Theta}(k+K-1), \xi_{k+K-1}) \mathbf{1} - \mathbf{G}^\top(\boldsymbol{\Theta}(k), \xi_{k+K-1}) \mathbf{1}] \\ &= \mathbf{p}(k, \boldsymbol{\Theta}(k), K-1) + \mathbf{H}(k+K-1) [\bar{\boldsymbol{\theta}}(k+K-1) - \bar{\boldsymbol{\theta}}(k)]. \end{aligned}$$

Recalling that 2 is the largest absolute value of eigenvalues of  $\mathbf{H}(k)$  for any  $k \in \mathbb{N}^+$  (which clearly exists and is bounded due to the bounded feature vectors  $\boldsymbol{\phi}(s)$  for any  $s \in \mathcal{S}$ ), the norm of  $\mathbf{p}(k, \boldsymbol{\Theta}(k), K)$  can be bounded as follows

$$\begin{aligned} \|\mathbf{p}(k, \boldsymbol{\Theta}(k), K)\| &\leq \|\mathbf{p}(k, \boldsymbol{\Theta}(k), K-1)\| + 2\|\bar{\boldsymbol{\theta}}(k+K-1) - \bar{\boldsymbol{\theta}}(k)\| \\ &= \|\mathbf{p}(k, \boldsymbol{\Theta}(k), K-1)\| + 2\alpha \left\| \sum_{j=k}^{k+K-2} \frac{1}{M} [\mathbf{G}^\top(\boldsymbol{\Theta}(j), \xi_j) \mathbf{1} - \mathbf{G}^\top(\boldsymbol{\Theta}(k), \xi_j) \mathbf{1}] \right. \\ &\quad \left. + \sum_{j=k}^{k+K-2} \frac{1}{M} \mathbf{G}^\top(\boldsymbol{\Theta}(k), \xi_j) \mathbf{1} \right\| \\ &\leq (1+2\alpha) \|\mathbf{p}(k, \boldsymbol{\Theta}(k), K-1)\| + 2 \sum_{j=k}^{k+K-2} \alpha \|\mathbf{H}(j) \bar{\boldsymbol{\theta}}(k) + b_{\mathcal{G}}\| \\ &\leq (1+2\alpha) \|\mathbf{p}(k, \boldsymbol{\Theta}(k), K-1)\| + 4\alpha \left( \sum_{j=k}^{k+K-2} \|\bar{\boldsymbol{\theta}}(k)\| + \frac{r_{\max}}{2} \right) \end{aligned}$$

where the last inequality follows from  $\|\mathbf{H}(j) \bar{\boldsymbol{\theta}}(k)\| \leq 2\|\bar{\boldsymbol{\theta}}(k)\|$  for any  $j \geq 0$ . Following the above recursion, we can write

$$\begin{aligned} \|\mathbf{p}(k, \boldsymbol{\Theta}(k), K)\| &\leq (1+2\alpha)^K \|\mathbf{p}(k, \boldsymbol{\Theta}(k), 0)\| + 4\alpha K \|\bar{\boldsymbol{\theta}}(k)\| \sum_{j=0}^{K-1} (1+2\alpha)^j (K-1-j) \\ &\leq 4\alpha (\|\bar{\boldsymbol{\theta}}(k)\| + \frac{r_{\max}}{2}) \sum_{j=0}^{K-1} (1+2\alpha)^j (K-1-j) \end{aligned} \quad (62)$$

where the second inequality because  $\|\mathbf{p}(k, \boldsymbol{\Theta}(k), 0)\| = 0$ .

For any positive constant  $x \neq 1$  and  $K \in \mathbb{N}^+$ , the following equality holds

$$\sum_{j=0}^{K-1} x^j (K-1-j) = \frac{x^K - Kx + K-1}{(1-x)^2}. \quad (63)$$

Substituting  $x = (1+2\alpha)$  into (63) along with plugging the result into (62) yields

$$\|\mathbf{p}(k, \boldsymbol{\Theta}(k), K)\| \leq \frac{(1+2\alpha)^K - 2K\alpha - 1}{\alpha} K \|\bar{\boldsymbol{\theta}}(k)\|. \quad (64)$$

According to the mid-value theorem, there exists some suitable constant  $\delta \in [0, 1]$  such that the following holds true

$$(1+2\alpha)^K = 1 + 2K\alpha + \frac{1}{2} K(K-1) (1 + \delta(2\alpha)^{K-2} (2\alpha)^2)$$

$$\leq 1 + 2K\alpha + \frac{1}{2}K^2(1+2\alpha)^{K-2}(2\alpha)^2. \quad (65)$$

Thus, it is clear that

$$\frac{(1+2\alpha)^K - 2K\alpha - 1}{\alpha} \leq 2\alpha K^2(1+2\alpha)^{K-2}. \quad (66)$$

Upon plugging (66) into (64), it follows that

$$\begin{aligned} \|\mathbf{p}(k, \boldsymbol{\Theta}(k), K)\| &\leq 2\alpha K^2(1+2\alpha)^{K-2}(\|\bar{\boldsymbol{\theta}}(k)\| + \frac{r_{\max}}{2}) \\ &\leq 2\alpha K^2(1+2\alpha)^{K-2}(\|\bar{\boldsymbol{\theta}}(k) - \boldsymbol{\theta}^*\| + \|\boldsymbol{\theta}^*\| + \frac{r_{\max}}{2}). \end{aligned} \quad (67)$$

Now, we turn to the third term in (60)

$$\begin{aligned} &2\alpha \mathbb{E} \left[ \left\langle \bar{\boldsymbol{\theta}}(k) - \boldsymbol{\theta}^*, \sum_{j=k}^{k+K-1} \frac{1}{M} [\mathbf{G}^\top(\boldsymbol{\Theta}(j), \xi_j) \mathbf{1} - \mathbf{G}^\top(\boldsymbol{\Theta}(k), \xi_j) \mathbf{1}] \right\rangle \middle| \mathcal{F}(k) \right] \\ &= 2\alpha \mathbb{E} [\langle \bar{\boldsymbol{\theta}}(k) - \boldsymbol{\theta}^*, \mathbf{p}(k, \boldsymbol{\Theta}(k), K) \rangle | \mathcal{F}(k)] \\ &\leq 2\alpha \mathbb{E} [\|\bar{\boldsymbol{\theta}}(k) - \boldsymbol{\theta}^*\| \cdot \|\mathbf{p}(k, \boldsymbol{\Theta}(k), K)\| | \mathcal{F}(k)] \\ &= 2\alpha \|\bar{\boldsymbol{\theta}}(k) - \boldsymbol{\theta}^*\| \cdot \mathbb{E} [\|\mathbf{p}(k, \boldsymbol{\Theta}(k), K)\| | \mathcal{F}(k)] \\ &\leq 4\alpha^2 K^2(1+2\alpha)^{K-2} \|\bar{\boldsymbol{\theta}}(k) - \boldsymbol{\theta}^*\| \cdot (\|\bar{\boldsymbol{\theta}}(k) - \boldsymbol{\theta}^*\| + \|\boldsymbol{\theta}^*\| + \frac{r_{\max}}{2}) \\ &\leq 4\alpha^2 K^2(1+2\alpha)^{K-2} \left( 2\|\bar{\boldsymbol{\theta}}(k) - \boldsymbol{\theta}^*\|^2 + \frac{1}{4}\|\boldsymbol{\theta}^*\|^2 + \frac{r_{\max}}{8} \right). \end{aligned} \quad (68)$$

where the second inequality is obtained by plugging in (67), and the last one follows from the inequality  $a(a+b) \leq 2a^2 + (1/4)b^2$ .

**3) Bounding the fourth term.** It follows that

$$\begin{aligned} &2\alpha \mathbb{E} \left[ \left\langle \bar{\boldsymbol{\theta}}(k) - \boldsymbol{\theta}^*, \sum_{j=k}^{k+K-1} \frac{1}{M} \mathbf{G}^\top(\boldsymbol{\Theta}(k), \xi_j) \mathbf{1} - K\bar{\mathbf{g}}(\bar{\boldsymbol{\theta}}(k)) \right\rangle \middle| \mathcal{F}(k) \right] \\ &= 2\alpha \left\langle \bar{\boldsymbol{\theta}}(k) - \boldsymbol{\theta}^*, \mathbb{E} \left[ \sum_{j=k}^{k+K-1} \frac{1}{M} \mathbf{G}(\boldsymbol{\Theta}(k), \xi_j)^T \mathbf{1} - K\bar{\mathbf{g}}(\bar{\boldsymbol{\theta}}(k)) \middle| \mathcal{F}(k) \right] \right\rangle \\ &\leq 2\alpha \|\bar{\boldsymbol{\theta}}(k) - \boldsymbol{\theta}^*\| \cdot \left\| \mathbb{E} \left[ \sum_{j=k}^{k+K-1} \frac{1}{M} \mathbf{G}(\boldsymbol{\Theta}(k), \xi_j)^T \mathbf{1} - K\bar{\mathbf{g}}(\bar{\boldsymbol{\theta}}(k)) \middle| \mathcal{F}(k) \right] \right\| \\ &\leq 2\alpha K\sigma(K) \|\bar{\boldsymbol{\theta}}(k) - \boldsymbol{\theta}^*\| (\|\bar{\boldsymbol{\theta}}(k) - \boldsymbol{\theta}^*\| + 1) \\ &\leq 2\alpha K\sigma(K) \left( 2\|\bar{\boldsymbol{\theta}}(k) - \boldsymbol{\theta}^*\|^2 + \frac{1}{4} \right). \end{aligned} \quad (69)$$

**4) Bounding the last term.** Evidently, we have that

$$\begin{aligned} &\left\| \frac{1}{M} \sum_{j=k}^{k+K-1} [\mathbf{G}^\top(\boldsymbol{\Theta}(j), \xi_j) \mathbf{1} - \mathbf{G}^\top(\boldsymbol{\Theta}(k), \xi_j) \mathbf{1} + \mathbf{G}^\top(\boldsymbol{\Theta}(k), \xi_j) \mathbf{1}] \right\|^2 \\ &\leq 2 \|\mathbf{p}(k, \boldsymbol{\Theta}(k), K)\|^2 + 2 \left\| \sum_{j=k}^{k+K-1} \frac{1}{M} \mathbf{G}^\top(\boldsymbol{\Theta}(k), \xi_j) \mathbf{1} \right\|^2 \\ &\leq 2 \|\mathbf{p}(k, \boldsymbol{\Theta}(k), K)\|^2 + 2 \left\| \sum_{j=k}^{k+K-1} \mathbf{H}(j) \bar{\boldsymbol{\theta}}(k) + \frac{1}{M} \mathbf{r}^\top(j) \mathbf{1} \phi(j) \right\|^2 \\ &\leq 16\alpha^2 K^4(1+2\alpha)^{2K-4} \|\bar{\boldsymbol{\theta}}(k)\|^2 + 16K \|\bar{\boldsymbol{\theta}}(k)\|^2 + [\alpha^2 K^4(1+2\alpha)^{2K-4} + 4K] r_{\max}^2 \end{aligned}$$

$$\leq \left[ 32\alpha^2 K^6 (1+2\alpha)^{2K-4} + 32K \right] (\|\bar{\boldsymbol{\theta}}(k) - \boldsymbol{\theta}^*\|^2 + \|\boldsymbol{\theta}^*\|^2) + [\alpha^2 K^4 (1+2\alpha)^{2K-4} + 4K] r_{\max}^2 \quad (70)$$

where the first and the last inequality is the result of  $\|\sum_{i=1}^n \mathbf{x}_i\|^2 \leq n \sum_{i=1}^n \|\mathbf{x}_i\|^2$  for any  $\mathbf{x}$  and  $n$ ; and the second is obtained by plugging in (67). Hence, upon taking expectation of both sides of (70) conditioning on  $\mathcal{F}(k)$ , we arrive at

$$\begin{aligned} & \alpha^2 \mathbb{E} \left[ \left\| \frac{1}{M} \sum_{j=k}^{k+K-1} \left[ \mathbf{G}^\top(\boldsymbol{\Theta}(j), \xi_j) \mathbf{1} - \mathbf{G}^\top(\boldsymbol{\Theta}(k), \xi_j) \mathbf{1} + \mathbf{G}^\top(\boldsymbol{\Theta}(k), \xi_j) \mathbf{1} \right] \right\|^2 \middle| \mathcal{F}(k) \right] \\ & \leq [32\alpha^4 K^6 (1+2\alpha)^{2K-4} + 32K\alpha^2] (\|\bar{\boldsymbol{\theta}}(k) - \boldsymbol{\theta}^*\|^2 + \|\boldsymbol{\theta}^*\|^2) + \alpha^2 [\alpha^2 K^4 (1+2\alpha)^{2K-4} + 4K] r_{\max}^2. \end{aligned} \quad (71)$$

We have successfully bounded each of the four terms in (60). Putting now together the bounds in (61), (68), (69), and (71) into (60), we finally arrive at

$$\mathbb{E} \left[ \|\bar{\boldsymbol{\theta}}(k+K) - \boldsymbol{\theta}^*\|^2 \middle| \mathcal{F}(k) \right] \leq [1 + 2\alpha T \lambda_{\max}^{\bar{\mathbf{H}}} + \alpha \Gamma_1(\alpha, K)] \|\bar{\boldsymbol{\theta}}(k) - \boldsymbol{\theta}^*\|^2 + \alpha \Gamma_2(\alpha, K) \quad (72)$$

where

$$\Gamma_1(\alpha, K) = 32\alpha^3 K^4 (1+2\alpha)^{2K-4} + 32K\alpha + 8\alpha K^2 (1+2\alpha)^{K-2} + 4K\sigma(K) \quad (73)$$

$$\begin{aligned} \Gamma_2(\alpha, K) &= [32\alpha^3 K^4 (1+2\alpha)^{2K-4} + 32K\alpha + \alpha K^2 (1+2\alpha)^{K-2}] \|\boldsymbol{\theta}^*\|^2 \\ &+ [4\alpha^3 K^4 (1+2\alpha)^{2K-4} + \frac{1}{2}\alpha K^2 (1+2\alpha)^{K-2} + 4\alpha K] r_{\max}^2 + \frac{1}{2} K \sigma(K) \end{aligned} \quad (74)$$

From the definition of our multi-step Lyapunov function, we obtain that

$$\begin{aligned} \mathbb{E} [\mathbb{V}(k+1) - \mathbb{V}(k) \middle| \mathcal{F}(k)] &= \mathbb{E} \left[ \|\bar{\boldsymbol{\theta}}(k+K) - \boldsymbol{\theta}^*\|^2 \middle| \mathcal{F}(k) \right] - \|\bar{\boldsymbol{\theta}}(k) - \boldsymbol{\theta}^*\|^2 \\ &\leq \alpha [2K \lambda_{\max}^{\bar{\mathbf{H}}} + \Gamma_1(\alpha, K)] \|\bar{\boldsymbol{\theta}}(k) - \boldsymbol{\theta}^*\|^2 + \alpha \Gamma_2(\alpha, K) \\ &\leq \alpha [2K_G \lambda_{\max}^{\bar{\mathbf{H}}} + \Gamma_1(\alpha_{\max}, K_G)] \|\bar{\boldsymbol{\theta}}(k) - \boldsymbol{\theta}^*\|^2 + \alpha \Gamma_2(\alpha_{\max}, K_G) \end{aligned} \quad (75)$$

where the last inequality is due to the fact that functions  $\Gamma_1(\alpha, K_G)$  and  $\Gamma_2(\alpha, K_G)$  are monotonically increasing in  $\alpha$ . This concludes the proof.  $\square$

## G Proof of Lemma 4

*Proof.* It is straightforward to check that

$$\begin{aligned} \|\bar{\boldsymbol{\theta}}(k+i) - \boldsymbol{\theta}^*\|^2 &= \left\| \bar{\boldsymbol{\theta}}(k+i-1) - \boldsymbol{\theta}^* + \frac{\alpha}{M} \mathbf{G}^\top(\boldsymbol{\Theta}(k+i-1), \xi_{k+i-1}) \mathbf{1} \right. \\ &\quad \left. - \frac{\alpha}{M} \mathbf{G}^\top(\mathbf{1}(\boldsymbol{\theta}^*)^\top, \xi_{k+i-1}) \mathbf{1} + \frac{\alpha}{M} \mathbf{G}^\top(\mathbf{1}(\boldsymbol{\theta}^*)^\top, \xi_{k+i-1}) \mathbf{1} \right\|^2 \\ &\leq \|\bar{\boldsymbol{\theta}}(k+i-1) - \boldsymbol{\theta}^*\|^2 + 3\alpha^2 \|\mathbf{H}(k)(\bar{\boldsymbol{\theta}}(k+i-1) - \boldsymbol{\theta}^*)\|^2 \\ &\quad + 3\alpha^2 \left\| \mathbf{H}(k)\boldsymbol{\theta}^* + \frac{1}{M} \boldsymbol{\phi}(s(k)) \mathbf{r}^\top(k) \mathbf{1} \right\|^2 \\ &\leq (3 + 12\alpha^2) \|\bar{\boldsymbol{\theta}}(k+i-1) - \boldsymbol{\theta}^*\|^2 + 6\alpha^2 [4\|\boldsymbol{\theta}^*\|^2 + r_{\max}^2] \\ &\leq (3 + 12\alpha^2)^i \|\bar{\boldsymbol{\theta}}(k) - \boldsymbol{\theta}^*\|^2 + 6\alpha^2 [4\|\boldsymbol{\theta}^*\|^2 + r_{\max}^2] \sum_{j=0}^{i-1} (3 + 12\alpha^2)^j. \end{aligned} \quad (76)$$

As a result,  $\mathbb{V}(k)$  can be bounded as

$$\begin{aligned}
 \mathbb{V}(k) &= \sum_{i=0}^{K_{\mathcal{G}}-1} \|\bar{\boldsymbol{\theta}}(k+i) - \boldsymbol{\theta}^*\|^2 \\
 &\leq \sum_{i=0}^{K_{\mathcal{G}}-1} (3+12\alpha^2)^i \|\bar{\boldsymbol{\theta}}(k) - \boldsymbol{\theta}^*\|^2 + 6\alpha^2(4\|\boldsymbol{\theta}^*\|^2 + r_{\max}) \sum_{i=1}^{K_{\mathcal{G}}-1} \sum_{j=0}^{i-1} (3+12\alpha^2)^j \\
 &= \frac{(3+12\alpha^2)^{K_{\mathcal{G}}} - 1}{2+12\alpha^2} \|\bar{\boldsymbol{\theta}}(k) - \boldsymbol{\theta}^*\|^2 \\
 &\quad + \alpha^2 \frac{6(3+12\alpha^2)[(3+12\alpha^2)^{K_{\mathcal{G}}-1} - 1] - 6K_{\mathcal{G}} + 6}{(2+12\alpha^2)^2} [4\|\boldsymbol{\theta}^*\|^2 + r_{\max}^2]
 \end{aligned} \tag{77}$$

With  $c_5 := \frac{(3+12\alpha_{\max}^2)^{K_{\mathcal{G}}}-1}{2+3\alpha_{\max}^2}$  and  $c_6 := \frac{6(3+12\alpha_{\max}^2)[(3+12\alpha_{\max}^2)^{K_{\mathcal{G}}-1}-1]-6K_{\mathcal{G}}+6}{2+12\alpha_{\max}^2} (4\|\boldsymbol{\theta}^*\|^2 + r_{\max}^2)$ , we conclude that

$$\mathbb{V}(k) \leq c_5 \|\bar{\boldsymbol{\theta}}(k) - \boldsymbol{\theta}^*\|^2 + \alpha^2 c_6. \tag{78}$$

□

## H Proof of Theorem 3

*Proof.* The convergence of  $\mathbb{E}[\|\bar{\boldsymbol{\theta}}(k) - \boldsymbol{\theta}^*\|^2]$  is separately addressed in two phases:

- 1) The time instant  $k < k_{\alpha}$ , with  $k_{\alpha} = \max\{k | \rho^k \geq \alpha\}$ , namely, it holds that  $\alpha\sigma(K) \leq \sigma_k(K) \leq \sigma(K)$  for any  $k < k_{\alpha}$ ;
- 2) The time instant  $k \geq k_{\alpha}$ , i.e., it holds that  $\sigma_k(K) \leq \alpha\sigma(K)$  for any  $k \geq k_{\alpha}$ .

### Convergence of the first phase

From Lemma 4, we have

$$-\|\bar{\boldsymbol{\theta}}(k) - \boldsymbol{\theta}^*\|^2 \leq -\frac{1}{c_5} \mathbb{V}(k) + \frac{\alpha^2 c_6}{c_5}. \tag{79}$$

Substituting (79) into (75), and rearranging the terms give the recursion of Lyapunov function as follows

$$\begin{aligned}
 \mathbb{E}[\mathbb{V}(k+1) | \mathcal{F}(k)] &\leq \left\{ 1 + \frac{1}{c_5} [2\alpha K_{\mathcal{G}} \lambda_{\max}^{\bar{\mathbf{H}}} + \alpha \Gamma_1(\alpha_{\max}, K_{\mathcal{G}})] \right\} \mathbb{E}[\mathbb{V}(k) | \mathcal{F}(k)] \\
 &\quad + \alpha \left\{ \Gamma_2(\alpha, K_{\mathcal{G}}) - \frac{\alpha^2 c_6}{c_5} [2K_{\mathcal{G}} \lambda_{\max}^{\bar{\mathbf{H}}} + \Gamma_1(\alpha_{\max}, K_{\mathcal{G}})] \right\} \\
 &\leq c_7 \mathbb{E}[\mathbb{V}(k) | \mathcal{F}(k)] + \alpha c_8
 \end{aligned} \tag{80}$$

where  $c_7 := 1 + \frac{1}{2c_5} \alpha_{\max} K_{\mathcal{G}} \lambda_{\max}^{\bar{\mathbf{H}}} \in (0, 1)$ ; constant  $c_8 := \Gamma_2(\alpha_{\max}, K_{\mathcal{G}}) - \frac{\alpha_{\max}^2 c_6}{c_5} K_{\mathcal{G}} \lambda_{\max}^{\bar{\mathbf{H}}} > 0$ , and the last inequality holds true because of (41).

Deducing from (80), we obtain that

$$\begin{aligned}
 \mathbb{E}[\mathbb{V}(k)] &\leq c_7^k \mathbb{V}(0) + \alpha c_8 \frac{1 - c_7^k}{1 - c_7} \\
 &= c_5 c_7^k \|\bar{\boldsymbol{\theta}}(0) - \boldsymbol{\theta}^*\|^2 + \alpha^2 c_6 c_7^k + \alpha c_8 \frac{1 - c_7^k}{1 - c_7} \\
 &\leq c_5 c_7^k \|\bar{\boldsymbol{\theta}}(0) - \boldsymbol{\theta}^*\|^2 + \alpha^2 c_6 + \frac{\alpha c_8}{1 - c_7}
 \end{aligned} \tag{81}$$

$$= c_5 c_7^k \|\bar{\boldsymbol{\theta}}(0) - \boldsymbol{\theta}^*\|^2 + \alpha^2 c_6 - \frac{2c_5 c_8}{K_{\mathcal{G}} \lambda_{\max}^{\bar{\mathbf{H}}}} \tag{82}$$

Recalling the definition of Lyapunov function, it is obvious that

$$\mathbb{E}[\|\bar{\boldsymbol{\theta}}(k) - \boldsymbol{\theta}^*\|^2] \leq \mathbb{E}[\mathbb{V}(k)] \leq c_5 c_7^k \|\bar{\boldsymbol{\theta}}(0) - \boldsymbol{\theta}^*\|^2 + \alpha^2 c_6 - \frac{2c_5 c_8}{K_{\mathcal{G}} \lambda_{\max}^{\bar{\mathbf{H}}}} \tag{83}$$



which finishes the proof of the first phase.

### Convergence of the second phase

Without repeating similar derivation, we directly have that the following holds for  $\sigma_k(K) \leq \alpha\sigma(K)$ :

$$\Gamma_1(\alpha, K) := 32\alpha^3 K^4(1+2\alpha)^{2K-4} + 32K\alpha + 8\alpha K^2(1+2\alpha)^{K-2} + 4K\alpha\sigma(K) \quad (84)$$

$$\begin{aligned} \Gamma_2(\alpha, K) &:= [32\alpha^3 K^4(1+2\alpha)^{2K-4} + 32K\alpha + \alpha K^2(1+2\alpha)^{K-2}] \|\boldsymbol{\theta}^*\|^2 \\ &\quad + [4\alpha^3 K^4(1+2\alpha)^{2K-4} + \frac{1}{2}\alpha K^2(1+2\alpha)^{K-2} + 4\alpha K] r_{\max}^2 + \frac{1}{2}K\alpha\sigma(K). \end{aligned} \quad (85)$$

Subsequently, we have the following recursion of  $\mathbb{V}(k)$  that is similar to but slightly different from (80).

$$\mathbb{E}[\mathbb{V}(k+1)|\mathcal{F}(k)] \leq c_7 \mathbb{E}[\mathbb{V}(k)|\mathcal{F}(k)] + \alpha^2 c'_8, \quad \forall k \geq k_\alpha \quad (86)$$

where  $c'_8 := [16\alpha_{\max}^2 K_G^6(1+2\alpha_{\max})^{2K_G-4} + 32K_G + 2K_G^3(1+2\alpha_{\max})^{K_G-2}] \|\boldsymbol{\theta}^*\|^2 + 4K_G r_{\max}^2 - \frac{1}{8}K_G \lambda_{\max}^{\bar{\mathbf{H}}} - \frac{\alpha_{\max} c_6}{c_5} K_G \lambda_{\max}^{\bar{\mathbf{H}}}$ . It is easy to check that  $c'_8 \geq c_8$  due to the fact that  $\alpha_{\max} < 1$  in our case.

Repeatedly applying the above recursion from  $k = k_\alpha$  to any  $k > k_\alpha$  yields

$$\begin{aligned} \mathbb{E}[\mathbb{V}(k)] &\leq c_7^{k-k_\alpha} \mathbb{E}[\mathbb{V}(k_\alpha)] + \alpha^2 c'_8 \frac{1 - c_7^{k-k_\alpha}}{1 - c_7} \\ &\leq c_7^{k-k_\alpha} \left( c_5 c_7^{k_\alpha} \|\bar{\boldsymbol{\theta}}(0) - \boldsymbol{\theta}^*\|^2 + \alpha^2 c_6 - \frac{2c_5 c_8}{K_G \lambda_{\max}^{\bar{\mathbf{H}}}} \right) - \alpha \frac{2c_5 c'_8}{K_G \lambda_{\max}^{\bar{\mathbf{H}}}} \\ &\leq c_5 c_7^k \|\bar{\boldsymbol{\theta}}(0) - \boldsymbol{\theta}^*\|^2 + c_7^{k-k_\alpha} \alpha^2 c_6 - (c_7^{k-k_\alpha} + \alpha) \frac{2c_5 c'_8}{K_G \lambda_{\max}^{\bar{\mathbf{H}}}} \end{aligned} \quad (87)$$

where we have used  $c_8 \leq c'_8$  for simplicity.

Again, using the definition of the Lyapunov function and (87), it follows that

$$\mathbb{E}[\|\bar{\boldsymbol{\theta}}(k) - \boldsymbol{\theta}^*\|^2] \leq c_5 c_7^k \|\bar{\boldsymbol{\theta}}(0) - \boldsymbol{\theta}^*\|^2 + c_7^{k-k_\alpha} \alpha^2 c_6 - (c_7^{k-k_\alpha} + \alpha) \frac{2c_5 c'_8}{K_G \lambda_{\max}^{\bar{\mathbf{H}}}}, \quad \forall k \geq k_\alpha \quad (88)$$

Combining the results in the above two phases, we conclude that the following bound holds for any  $k \in \mathbb{N}^+$

$$\mathbb{E}[\|\bar{\boldsymbol{\theta}}(k) - \boldsymbol{\theta}^*\|^2] \leq c_5 c_7^k \|\bar{\boldsymbol{\theta}}(0) - \boldsymbol{\theta}^*\|^2 - \frac{2c_5 c'_8}{K_G \lambda_{\max}^{\bar{\mathbf{H}}}} \alpha + \min\{1, c_7^{k-k_\alpha}\} \times \left( \alpha^2 c_6 - \frac{2c_5 c'_8}{K_G \lambda_{\max}^{\bar{\mathbf{H}}}} \right). \quad (89)$$

□

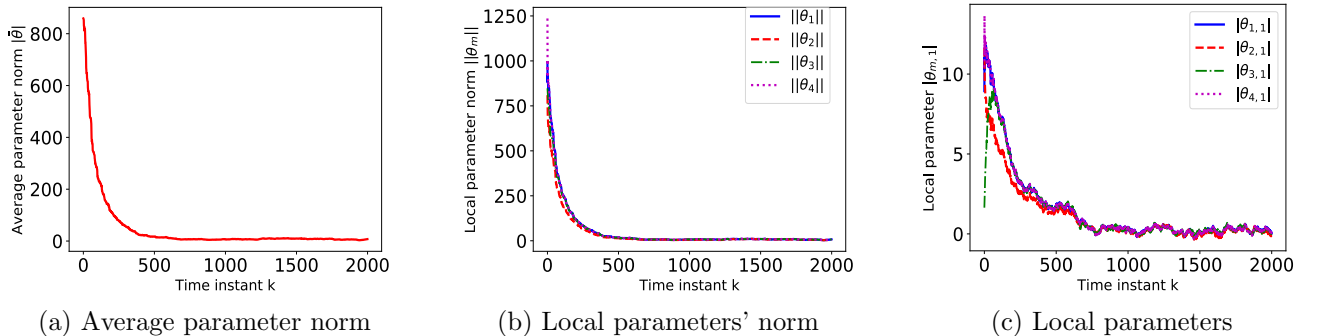

Figure 1: Consensus and convergence of decentralized TD(0) learning

## I SIMULATIONS

In order to verify our analytical results, we carried out experiments on a multi-agent networked system. The details of our experimental setup are as follows: the number of agents  $M = 30$ , the state space size  $|\mathcal{S}| = 100$  with each state  $s$  being a vector of length  $|s| = 20$ , the dimension of learning parameter  $\boldsymbol{\theta}$  is  $p = 10$ , the reward upper bound  $r^{\max} = 10$ , and the stepsize  $\alpha = 0.01$ . The feature vectors are cosine functions, that is,  $\boldsymbol{\phi}(s) = \cos(\mathbf{A}s)$ , where  $\mathbf{A} \in \mathcal{R}^{p \times |s|}$  is a randomly generated matrix. The communication weight matrix  $\mathbf{W}$  depicting the neighborhood of the agents including the topology and the weights was generated randomly, with each agent being associated with 5 neighbors on average. As illustrated in Fig. 1(a), the parameter average  $\bar{\boldsymbol{\theta}}$  converges to a small neighborhood of the optimum at a linear rate. To demonstrate the consensus among agents, convergence of the parameter norms  $\|\boldsymbol{\theta}_m\|$  for  $m = 1, 2, 3, 4$  is presented in Fig. 1(b), while that of their first elements  $|\theta_{m,1}|$  is depicted in Fig. 1(c). The simulation results corroborate our theoretical analysis.
